# Supplementary material for: No Association Between Loneliness, Episodic Memory and Hippocampal Volume Change in Young and Healthy Older Adults: A Longitudinal European Multicenter Study
Source: PubMed Central journal article supplement (PMC8905540; doi:10.3389/fnagi.2022.795764), 2022-02-23

**Loneliness ~ cortical thickness**

**Loneliness\*age ~ cortical thickness**

**A. BASE-II**

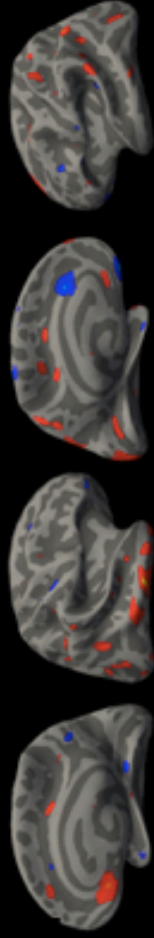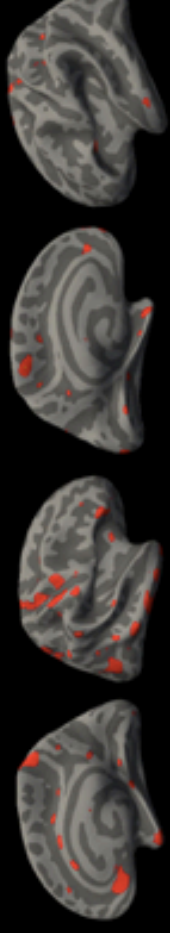

**B. BETULA**

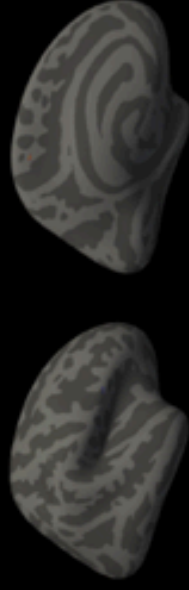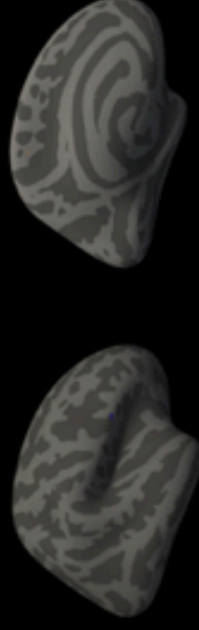

**C. HUBU**

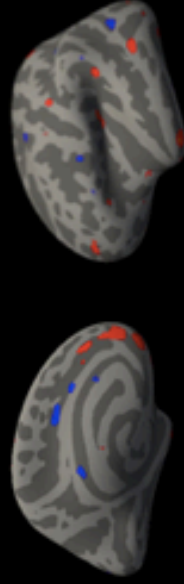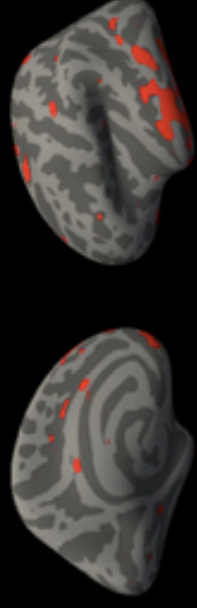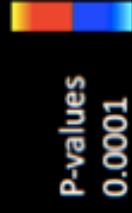

Supplement: Image_1.pdf [file Image_1.pdf]
